# Supplementary material
Source: bioRxiv or medRxiv preprint supplement (https://www.biorxiv.org/highwire/filestream/75909/field_highwire_adjunct_files/3/241760-4.pdf)

# Karasov, Figure S4

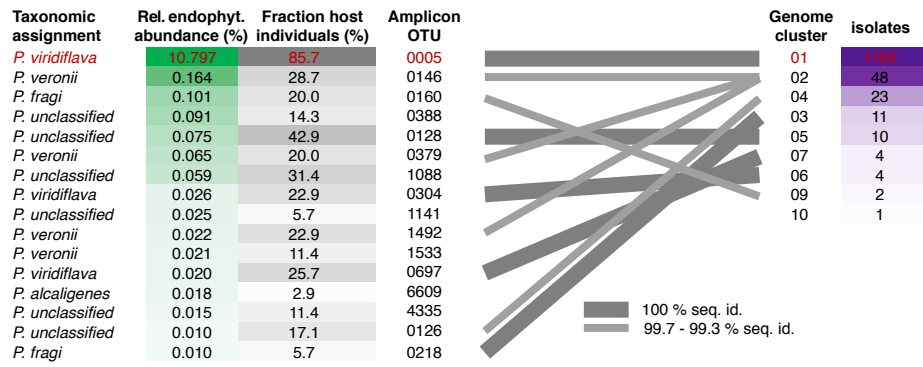

Supplement: Supplementary file [file 241760-4.pdf]
